# Supplementary material for: Bisdemethoxycurcumin inhibits ovarian cancer via reducing oxidative stress mediated MMPs expressions
Source: PubMed Central journal article supplement (PMC4923879; doi:10.1038/srep28773), 2016-06-28
Supplement: srep28773-s1.pdf [file srep28773-s1.pdf]

**Bisdemethoxycurcumin inhibits ovarian cancer via reducing oxidative stress  
mediated MMPs expression**

Haifeng Pei<sup>1</sup>, Yi Yang<sup>1</sup>, Lin Cui<sup>2</sup>, Jiong Yang<sup>1</sup>, Xiuchuan Li<sup>1</sup>, Yongjian Yang<sup>1,\*</sup>, Haixia Duan<sup>3,\*</sup>

<sup>1</sup> Department of Cardiology, Chengdu Military General Hospital, Chengdu 610083, China;

<sup>2</sup> Department of Orthopedics, Chengdu Military General Hospital, Chengdu 610083, China;

<sup>3</sup> Department of Obstetrics and Gynecology, Affiliated Guangren Hospital, College of Medicine, Xi'an Jiaotong University, Xi'an 710004, China.

**Running title:** BDMC and Ovarian Cancer

**\* Address correspondence to:**

Haixia Duan, MD, PhD  
Affiliated Guangren Hospital,  
College of Medicine, Xi'an Jiaotong University  
21 Jiefang Road  
Xi'an 710004, China  
E-mail: [dhx20167@126.com](mailto:dhx20167@126.com)

Tel: +86-29-8742-0006

Fax: +86-29-8742-0008

Or

Yongjian Yang, MD, PhD  
Chengdu Military General Hospital  
270 Tianhui Road  
Chengdu 610083, China  
E-mail: [yyj10001@126.com](mailto:yyj10001@126.com)

Tel: +86-28-8657-0211

Fax: +86-28-8357-2211

**Supplemental Table 1. The influence of BDMC on the cycle of SKOV-3 cell.** BDMC arrests the cells at G1 phase of the cell cycle. Serum-1640 SKOV-3 ( $1 \times 10^6$  cells/ml) was incubated in the absence or presence of different doses of BDMC for 6, 12 and 24h, respectively. Thereafter, the cells were washed, fixed, stained with propidium iodide, and analyzed for DNA content by flow cytometry. BDMC, Bisdemethoxycurcumin. \*\* $p < 0.01$  vs. 0  $\mu$ M BDMC.

**Table 1. The influence of BDMC on the cycle of SKOV-3 cell.**

| BDMC (concentration)<br>( $\mu$ M) | Action time<br>(h) | Proportion of cell cycle (%) |      |      |
|------------------------------------|--------------------|------------------------------|------|------|
|                                    |                    | G1                           | S    | G2   |
| —                                  | 0                  | 58.1                         | 35.2 | 6.73 |
| 5                                  | 6                  | 60.5**                       | 32.2 | 7.29 |
| 10                                 | 6                  | 65.6**                       | 22   | 7.94 |
| 15                                 | 6                  | 66.5**                       | 26.7 | 6.72 |
| 5                                  | 12                 | 70.1**                       | 21.6 | 8.27 |
| 10                                 | 12                 | 71.7**                       | 20.1 | 8.16 |
| 15                                 | 12                 | 75.4**                       | 19.7 | 4.86 |
| 5                                  | 24                 | 76.7**                       | 17.3 | 6.03 |
| 10                                 | 24                 | 78.5**                       | 15.6 | 5.85 |
| 15                                 | 24                 | 79.7**                       | 16.4 | 3.89 |
